# Supplementary material for: The roles of ING5 expression in ovarian carcinogenesis and subsequent progression: a target of gene therapy
Source: PubMed Central journal article supplement (PMC5732741; doi:10.18632/oncotarget.21968), 2017-10-19
Supplement: oncotarget-08-103449-s001.pdf [file oncotarget-08-103449-s001.pdf]

# The roles of ING5 expression in ovarian carcinogenesis and subsequent progression: a target of gene therapy

## SUPPLEMENTARY MATERIALS

**Supplementary Table 1: Primers employed in the present study**

| Names             | Primer's sequence                                                      | Distribution              | AT (°C) | Product size (bp) | Extension time (s) |
|-------------------|------------------------------------------------------------------------|---------------------------|---------|-------------------|--------------------|
| <i>E-cadherin</i> | F:5'-CCGCCATCGCTTACA-3'<br>R:5'-GGCACCTGACCCTTGTA-3'                   | NM-057374.2<br>1017-1278  | 60      | 262               | 34                 |
| <i>N-cadherin</i> | F:5'-GAAAGACCCATCCACG- 3'<br>R: 5'-CCTGCTCACCACCACTA- 3'               | NM-031333.1<br>2365-2581  | 60      | 217               | 34                 |
| <i>MMP2</i>       | F:5'- TGATCTTGACCAGAATACCATCGA- 3'<br>R: 5'- GGCTTGCGAGGGAAGAAGTT - 3' | XM_004057658.2<br>429-518 | 60      | 94                | 34                 |
| <i>MMP9</i>       | F:5'- TGTACCCTATGGTTACT - 3'<br>R: 5'- CCTCAAAGGTTTGAAT - 3'           | NM_004994.2<br>169-353    | 60      | 189               | 34                 |
| <i>MRP1</i>       | F:5'- TTTCAGAACACGGTCTCTCG - 3'<br>R: 5'-TGGGCTGACCAGAAACACT - 3'      | XM_017023243.1 154-387    | 60      | 234               | 34                 |
| <i>TOPI</i>       | F:5'- AAAGATCGAGAACACCGG- 3'<br>R: 5'- TGTTTGGTCTTCTCCTTCT- 3'         | XM_004062154.1<br>335-456 | 60      | 122               | 34                 |
| <i>TOPII</i>      | F:5'-AAAATGAAGATGCTAAGAAAAGACT-3'<br>R:5'-GTACAAACCAGGAACAAAAGTGACT-3' | XM_004041770.2<br>218-405 | 60      | 188               | 34                 |
| <i>FBXW7</i>      | F:5'-AGATGGACCAGGAGAGTG-3'<br>R: 5'-CTTGCATGGTTTCTTCC-3'               | NM_001349798.1 1531-1748  | 60      | 218               | 34                 |
| <i>VEGF</i>       | F:5'- GCGCTCGGTGCTGGAATTTG - 3'<br>R: 5'- TAGAGCAATCTCCCAAGCCG - 3'    | XM_016955597.1<br>138-298 | 60      | 161               | 34                 |
| <i>MDR1</i>       | F:5'- ACACCTGGGCATCG - 3'<br>R: 5'- TATTAGGCAGTGACTCGA - 3'            | NM_001348946.1 3878-4035  | 60      | 158               | 34                 |
| <i>BCRP</i>       | F:5'- GACAGCTTCCAATGACCTGAA - 3'<br>R: 5'-CAGGATGGCGTTGAGACC - 3'      | NM_001348989.1 204-375    | 60      | 172               | 34                 |
| <i>GST-π</i>      | F: 5'- CGGGCAAGGATGACTATGTGA - 3'<br>R: 5'- GGGCTAGGACCTCATGGATCA - 3' | BC044846.1<br>1137-1475   | 60      | 339               | 34                 |
| <i>GAPDH</i>      | F: 5'-CAATGACCCCTTCATTGACC-3'<br>R: 5'- TGGAAGATGGTGATGGGATT-3'        | NM_002046.3<br>201-335    | 60      | 135               | 34                 |

AT = annealing temperature.

**Supplementary Table 2: The antibodies used for western blot and immunohistochemistry**

| <b>Num</b> | <b>Antibody</b>       | <b>Species</b> | <b>Dilution</b> | <b>Company</b> | <b>Code number</b> |
|------------|-----------------------|----------------|-----------------|----------------|--------------------|
| 1          | Bcl-2 (C-21)          | rabbit         | 1:700           | santa cruz     | sc-783             |
| 2          | $\beta$ -catenin(E-5) | mouse          | 1:1000          | santa cruz     | sc-7963            |
| 3          | LC-3B                 | rabbit         | 1:1000          | wanleibio      | wl01506            |
| 4          | ADFP                  | rabbit         | 1:2000          | abcam          | ab51031            |
| 5          | ING5                  | goat           | 1:1000          | abcam          | ab3716             |
| 6          | LaminB(C-20)          | goat           | 1:500           | santa cruz     | sc-624             |
| 7          | Bax(B-9)              | mouse          | 1:500           | santa cruz     | sc-7480            |
| 8          | P53                   | rabbit         | 1:1000          | wanleibio      | WL02384            |
| 9          | Cdc25b(C-20)          | rabbit         | 1:500           | santa cruz     | sc-326             |
| 10         | Cdk4 (C-22)           | rabbit         | 1:500           | santa cruz     | sc-260             |
| 11         | PI3 Kinase            | rabbit         | 1:1000          | abcam          | ab151549           |
| 12         | 14-3-3(H-8)           | mouse          | 1:500           | santa cruz     | sc-1657            |
| 13         | Akt                   | rabbit         | 1:500           | santa cruz     | sc-8312            |
| 14         | p-Akt                 | rabbit         | 1:500           | santa cruz     | sc-16646           |
| 15         | Bcl-xs/l(S-18)        | rabbit         | 1:500           | santa cruz     | sc-634             |
| 16         | LRP                   | rabbit         | 1:1000          | abcam          | ab28320            |
| 17         | BCRP                  | rabbit         | 1:1000          | abcam          | ab108312           |
| 18         | CD147                 | rabbit         | 1:1000          | abcam          | ab108317           |
| 19         | GST $\pi$             | rabbit         | 1:1000          | abcam          | ab34934            |
| 20         | NFKB                  | rabbit         | 1:1000          | CST            | 8242s              |
| 21         | MMP-9(2C3)            | mouse          | 1:500           | santa cruz     | sc-21733           |
| 22         | MMP-2                 | mouse          | 1:500           | santa cruz     | sc-13594           |
| 23         | N-cadherin            | mouse          | 1:1000          | abcam          | ab98952            |
| 24         | ATG13                 | rabbit         | 1:1000          | abcam          | ab155826           |
| 25         | HXK1(N-19)            | goat           | 1:500           | santa cruz     | sc-6517            |
| 26         | CS(P-20)              | goat           | 1:500           | santa cruz     | sc-242444          |
| 27         | E-cadherin            | mouse          | 1:1000          | abcam          | ab76055            |
| 28         | VEGF(A-20)            | rabbit         | 1:500           | santa cruz     | sc-152             |
| 29         | Beclin 1              | rabbit         | 1:500           | santa cruz     | sc-11427           |
| 30         | Ki-67                 | rabbit         | 1:300           | abcam          | Ab15580            |
| 31         | GAPDH(6C5)            | mouse          | 1:2000          | santa cruz     | sc-32233           |
| 32         | $\beta$ -actin(C4)    | mouse          | 1:2000          | santa cruz     | sc-47778           |
